# Supplementary material for: Tailoring copper(ii) complexes with pyridine-4,5-dicarboxylate esters for anti-Candida activity
Source: Royal Society of Chemistry journal article supplement (doi:10.1039/d0dt04061d), 2021-01-01
Supplement: d0dt04061d1.pdf [file d0dt04061d1.pdf]

## **Tailoring copper(II) complexes with pyridine-4,5-dicarboxylate esters for anti-*Candida* activity**

Tina P. Andrejević,<sup>a</sup> Ivana Aleksic,<sup>b</sup> Marta Počkaj,<sup>c</sup> Jakob Kljun,<sup>c</sup> Dusan Milivojevic,<sup>b</sup> Nevena Lj. Stevanović,<sup>a</sup> Jasmina Nikodinovic-Runic,<sup>\*b</sup> Iztok Turel,<sup>\*c</sup> Miloš I. Djuran,<sup>\*d</sup> and Biljana Đ. Glišić<sup>\*a</sup>

<sup>a</sup>*University of Kragujevac, Faculty of Science, Department of Chemistry, R. Domanovića 12, 34000 Kragujevac, Serbia*

<sup>b</sup>*Institute of Molecular Genetics and Genetic Engineering, University of Belgrade, Vojvode Stepe 444a, 11042 Belgrade, Serbia*

<sup>c</sup>*University of Ljubljana, Faculty of Chemistry and Chemical Technology, Večna pot 113, SI-1000 Ljubljana, Slovenia*

<sup>e</sup>*Serbian Academy of Sciences and Arts, Knez Mihailova 35, 11000 Belgrade, Serbia*

\*Corresponding authors. Tel.: +381 11 397 6034 (J. Nikodinovic-Runic); Tel.: +386 1 47 98 525 (I. Turel); Tel.: +381 34 300 251 (M. I. Djuran); Tel.: +381 34 336 223 (B. Đ. Glišić).

*E-mail addresses:* [jasmina.nikodinovic@imgge.bg.ac.rs](mailto:jasmina.nikodinovic@imgge.bg.ac.rs) (J. Nikodinovic-Runic);  
[Iztok.Turel@fkkt.uni-lj.si](mailto:Iztok.Turel@fkkt.uni-lj.si) (I. Turel); [milos.djuran@pmf.kg.ac.rs](mailto:milos.djuran@pmf.kg.ac.rs) (M. I. Djuran);  
[biljana.glisic@pmf.kg.ac.rs](mailto:biljana.glisic@pmf.kg.ac.rs) (B. Đ. Glišić)

**TABLE OF CONTENTS**

|                                                                                                                                                                                                                                                                                                                                                                                                                                                                              |    |
|------------------------------------------------------------------------------------------------------------------------------------------------------------------------------------------------------------------------------------------------------------------------------------------------------------------------------------------------------------------------------------------------------------------------------------------------------------------------------|----|
| <b>Fig. S1</b> Time stability of complex <b>1</b> followed by UV-Vis spectrophotometry at room temperature in DMSO.                                                                                                                                                                                                                                                                                                                                                          | S3 |
| <b>Fig. S2</b> Cyclic voltammograms of the copper(II) complexes <b>2</b> and <b>3</b> (A) and <b>4</b> and <b>5</b> (B), alongside the corresponding CuX <sub>2</sub> salt (X = NO <sub>3</sub> <sup>-</sup> and Cl <sup>-</sup> ) at GC electrode in DMSO and 0.1 M TBAHP as a supporting electrolyte with a scan rate of 50 mV s <sup>-1</sup> . The conditions were the following: $E_{\text{begin}} = -2.0$ V, $E_{\text{end}} = 2.0$ V and $E_{\text{step}} = 0.002$ V. | S4 |
| <b>Fig. S3</b> Filamentation of <i>C. albicans</i> ATCC 10231 in presence of subinhibitory concentrations ( $0.5 \times \text{MIC}$ ) of complexes <b>1</b> and <b>4</b> in liquid RPMI medium (Olympus BX51, Applied Imaging Corp., San Jose, CA, United States, under $20 \times$ magnification).                                                                                                                                                                          | S5 |
| <b>Table S1</b> Values of the binding constants of copper(II) complexes <b>1</b> – <b>5</b> with ct-DNA.                                                                                                                                                                                                                                                                                                                                                                     | S6 |
| <b>Table S2</b> Details of the crystal structure determination for copper(II) complexes <b>1</b> – <b>5</b> .                                                                                                                                                                                                                                                                                                                                                                | S7 |

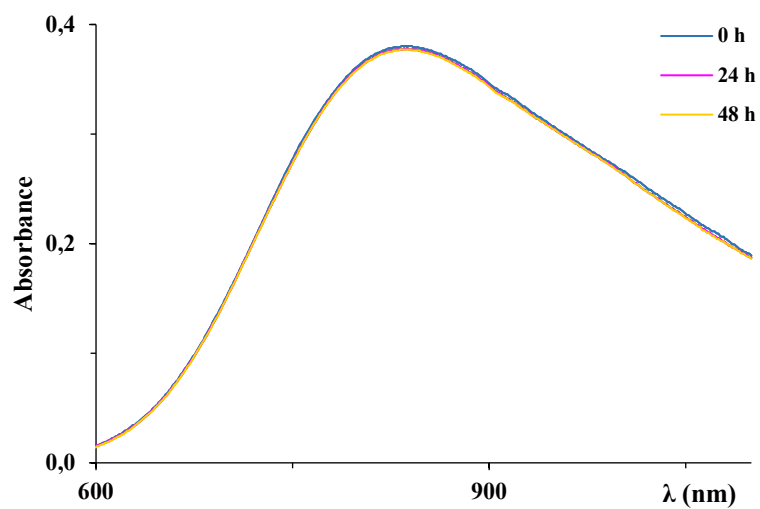

**Fig. S1** Time stability of complex **1** followed by UV-Vis spectrophotometry at room temperature in DMSO.

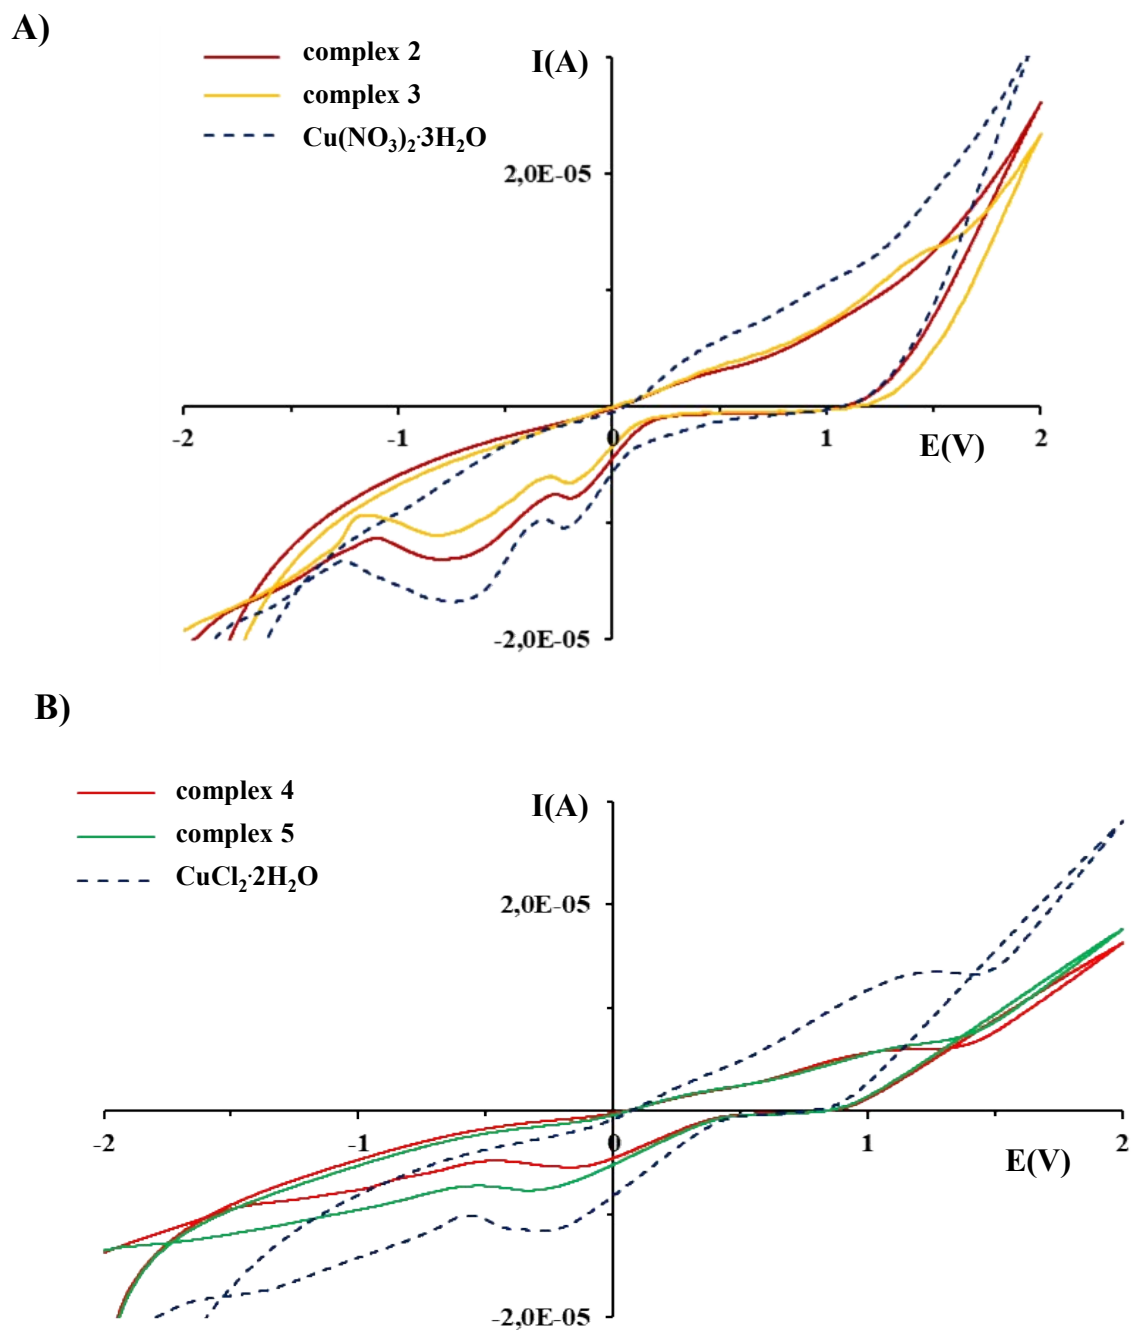

**Fig. S2** Cyclic voltammograms of the copper(II) complexes **2** and **3** (A) and **4** and **5** (B), alongside the corresponding  $\text{CuX}_2$  salt ( $\text{X} = \text{NO}_3^-$  and  $\text{Cl}^-$ ) at GC electrode in DMSO and 0.1 M TBAHP as a supporting electrolyte with a scan rate of  $50 \text{ mV s}^{-1}$ . The conditions were the following:  $E_{\text{begin}} = -2.0 \text{ V}$ ,  $E_{\text{end}} = 2.0 \text{ V}$  and  $E_{\text{step}} = 0.002 \text{ V}$ .

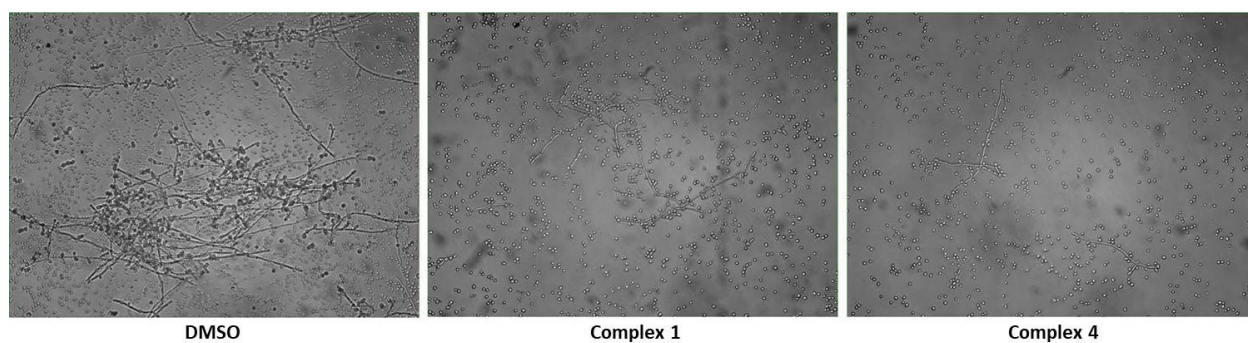

**Fig. S3** Filamentation of *C. albicans* ATCC 10231 in presence of subinhibitory concentrations ( $0.5 \times \text{MIC}$ ) of complexes **1** and **4** in liquid RPMI medium (Olympus BX51, Applied Imaging Corp., San Jose, CA, United States, under  $20 \times$  magnification).

**Table S1** Values of the binding constants of copper(II) complexes **1 – 5** with ct-DNA.

| Complex  | $K_{sv}$ ( $M^{-1}$ )        | Hypochromism (%) | $K_q$ ( $M^{-1}s^{-1}$ ) | $K_A$ ( $M^{-1}$ ) | $n$  |
|----------|------------------------------|------------------|--------------------------|--------------------|------|
| <b>1</b> | $(1.06 \pm 0.01) \cdot 10^3$ | 15.6             | $1.06 \cdot 10^{11}$     | $8.75 \cdot 10^2$  | 0.97 |
| <b>2</b> | $(8.15 \pm 0.40) \cdot 10^2$ | 12.0             | $8.15 \cdot 10^{10}$     | $8.51 \cdot 10^2$  | 0.99 |
| <b>3</b> | $(9.66 \pm 0.15) \cdot 10^2$ | 15.4             | $9.66 \cdot 10^{10}$     | $1.12 \cdot 10^2$  | 0.75 |
| <b>4</b> | $(1.22 \pm 0.03) \cdot 10^3$ | 17.1             | $1.22 \cdot 10^{11}$     | $7.09 \cdot 10^2$  | 0.93 |
| <b>5</b> | $(1.01 \pm 0.04) \cdot 10^3$ | 15.5             | $1.01 \cdot 10^{11}$     | $3.55 \cdot 10^2$  | 0.86 |

**Table S2** Details of the crystal structure determination for copper(II) complexes **1 – 5**.

| Complex                                                      | <b>1</b>                                                                            | <b>2</b>                                                                           | <b>3</b>                                                                           | <b>4</b>                                                                                                     | <b>5</b>                                                                                                     |
|--------------------------------------------------------------|-------------------------------------------------------------------------------------|------------------------------------------------------------------------------------|------------------------------------------------------------------------------------|--------------------------------------------------------------------------------------------------------------|--------------------------------------------------------------------------------------------------------------|
| CCDC No.                                                     | 2041822                                                                             | 2041823                                                                            | 2041819                                                                            | 2041821                                                                                                      | 2041820                                                                                                      |
| Empirical formula                                            | C <sub>12</sub> H <sub>16</sub> CuN <sub>4</sub> O <sub>13</sub> S                  | C <sub>13</sub> H <sub>14</sub> Cu <sub>1</sub> N <sub>4</sub> O <sub>11</sub> S   | C <sub>14</sub> H <sub>16</sub> Cu <sub>1</sub> N <sub>4</sub> O <sub>12</sub>     | C <sub>24</sub> H <sub>20</sub> Cl <sub>4</sub> Cu <sub>2</sub> N <sub>4</sub> O <sub>8</sub> S <sub>2</sub> | C <sub>26</sub> H <sub>24</sub> Cl <sub>4</sub> Cu <sub>2</sub> N <sub>4</sub> O <sub>8</sub> S <sub>2</sub> |
| Formula weight                                               | 519.89                                                                              | 497.88                                                                             | 495.85                                                                             | 825.44                                                                                                       | 853.49                                                                                                       |
| Temperature/K                                                | 150(2)                                                                              | 150(2)                                                                             | 150(2)                                                                             | 150(2)                                                                                                       | 150(2)                                                                                                       |
| Crystal system                                               | triclinic                                                                           | monoclinic                                                                         | monoclinic                                                                         | triclinic                                                                                                    | monoclinic                                                                                                   |
| Space group                                                  | <i>P</i> $\bar{1}$                                                                  | <i>P</i> 2 <sub>1</sub> / <i>c</i>                                                 | <i>C</i> <i>c</i>                                                                  | <i>P</i> $\bar{1}$                                                                                           | <i>P</i> 2 <sub>1</sub> / <i>c</i>                                                                           |
| <i>a</i> /Å                                                  | 7.8810(3)                                                                           | 9.1313(6)                                                                          | 10.3255(6)                                                                         | 7.7848(5)                                                                                                    | 12.0032(7)                                                                                                   |
| <i>b</i> /Å                                                  | 12.4005(4)                                                                          | 24.6456(11)                                                                        | 22.7235(11)                                                                        | 9.0261(6)                                                                                                    | 17.3134(8)                                                                                                   |
| <i>c</i> /Å                                                  | 20.9376(6)                                                                          | 8.5875(5)                                                                          | 8.0546(5)                                                                          | 11.9040(5)                                                                                                   | 7.6901(4)                                                                                                    |
| $\alpha$ /°                                                  | 79.593(3)                                                                           | 90                                                                                 | 90                                                                                 | 101.778(4)                                                                                                   | 90                                                                                                           |
| $\beta$ /°                                                   | 88.991(2)                                                                           | 106.946(7)                                                                         | 101.849(6)                                                                         | 100.435(4)                                                                                                   | 99.719(5)                                                                                                    |
| $\gamma$ /°                                                  | 88.486(3)                                                                           | 90                                                                                 | 90                                                                                 | 109.621(6)                                                                                                   | 90                                                                                                           |
| Volume/Å <sup>3</sup>                                        | 2011.66(12)                                                                         | 1848.67(19)                                                                        | 1849.59(19)                                                                        | 742.48(8)                                                                                                    | 1575.19(14)                                                                                                  |
| <i>Z</i>                                                     | 4                                                                                   | 4                                                                                  | 4                                                                                  | 1                                                                                                            | 2                                                                                                            |
| $\rho_{\text{calc}}/\text{g cm}^{-3}$                        | 1.717                                                                               | 1.789                                                                              | 1.781                                                                              | 1.846                                                                                                        | 1.799                                                                                                        |
| $\mu/\text{mm}^{-1}$                                         | 1.265                                                                               | 1.364                                                                              | 1.259                                                                              | 6.887                                                                                                        | 1.878                                                                                                        |
| <i>F</i> (000)                                               | 1060                                                                                | 1012                                                                               | 1012                                                                               | 414                                                                                                          | 860                                                                                                          |
| Crystal size/mm <sup>3</sup>                                 | 0.5 × 0.3 × 0.05                                                                    | 0.35 × 0.10 × 0.10                                                                 | 0.30 × 0.05 × 0.05                                                                 | 0.15 × 0.10 × 0.02                                                                                           | 0.1 × 0.1 × 0.05                                                                                             |
| Radiation                                                    | Mo K $\alpha$<br>( $\lambda$ = 0.71073)                                             | Mo K $\alpha$<br>( $\lambda$ = 0.71073)                                            | Mo K $\alpha$<br>( $\lambda$ = 0.71073)                                            | Cu K $\alpha$<br>( $\lambda$ = 1.54184)                                                                      | Mo K $\alpha$<br>( $\lambda$ = 0.71073)                                                                      |
| 2 $\theta$ range for data collection/°                       | 4.696 to 60.912                                                                     | 5.228 to 60.76                                                                     | 6.134 to 60.586                                                                    | 7.882 to 150.492                                                                                             | 4.706 to 54.962                                                                                              |
| Index ranges                                                 | -11 ≤ <i>h</i> ≤ 11,<br>-17 ≤ <i>k</i> ≤ 17,<br>-29 ≤ <i>l</i> ≤ 29                 | -6 ≤ <i>h</i> ≤ 12,<br>-34 ≤ <i>k</i> ≤ 21,<br>-12 ≤ <i>l</i> ≤ 9                  | -14 ≤ <i>h</i> ≤ 9,<br>-32 ≤ <i>k</i> ≤ 21,<br>-11 ≤ <i>l</i> ≤ 11                 | -9 ≤ <i>h</i> ≤ 9,<br>-11 ≤ <i>k</i> ≤ 10,<br>-14 ≤ <i>l</i> ≤ 12                                            | -15 ≤ <i>h</i> ≤ 11,<br>-22 ≤ <i>k</i> ≤ 22,<br>-9 ≤ <i>l</i> ≤ 9                                            |
| Reflections collected                                        | 25294                                                                               | 10122                                                                              | 5050                                                                               | 7240                                                                                                         | 8104                                                                                                         |
| Independent reflections                                      | 10742<br>[ <i>R</i> <sub>int</sub> = 0.0300,<br><i>R</i> <sub>sigma</sub> = 0.0389] | 4849<br>[ <i>R</i> <sub>int</sub> = 0.0299,<br><i>R</i> <sub>sigma</sub> = 0.0521] | 3279<br>[ <i>R</i> <sub>int</sub> = 0.0284,<br><i>R</i> <sub>sigma</sub> = 0.0494] | 3047<br>[ <i>R</i> <sub>int</sub> = 0.0347,<br><i>R</i> <sub>sigma</sub> = 0.0420]                           | 3608<br>[ <i>R</i> <sub>int</sub> = 0.0277,<br><i>R</i> <sub>sigma</sub> = 0.0374]                           |
| Data/restraints/parameters                                   | 10742/6/594                                                                         | 4849/2/282                                                                         | 3279/6/298                                                                         | 3047/0/201                                                                                                   | 3608/0/211                                                                                                   |
| Goodness-of-fit on <i>F</i> <sup>2</sup>                     | 1.057                                                                               | 1.031                                                                              | 1.053                                                                              | 1.074                                                                                                        | 1.048                                                                                                        |
| Final <i>R</i> indexes [ <i>I</i> ≥ 2 $\sigma$ ( <i>I</i> )] | <i>R</i> <sub>1</sub> = 0.0378,<br><i>wR</i> <sub>2</sub> = 0.0961                  | <i>R</i> <sub>1</sub> = 0.0382,<br><i>wR</i> <sub>2</sub> = 0.0769                 | <i>R</i> <sub>1</sub> = 0.0336,<br><i>wR</i> <sub>2</sub> = 0.0714                 | <i>R</i> <sub>1</sub> = 0.0400,<br><i>wR</i> <sub>2</sub> = 0.1044                                           | <i>R</i> <sub>1</sub> = 0.0315,<br><i>wR</i> <sub>2</sub> = 0.0732                                           |
| Final <i>R</i> indexes [all data]                            | <i>R</i> <sub>1</sub> = 0.0473,<br><i>wR</i> <sub>2</sub> = 0.1029                  | <i>R</i> <sub>1</sub> = 0.0556,<br><i>wR</i> <sub>2</sub> = 0.0846                 | <i>R</i> <sub>1</sub> = 0.0391,<br><i>wR</i> <sub>2</sub> = 0.0745                 | <i>R</i> <sub>1</sub> = 0.0465,<br><i>wR</i> <sub>2</sub> = 0.1108                                           | <i>R</i> <sub>1</sub> = 0.0400,<br><i>wR</i> <sub>2</sub> = 0.0787                                           |
| Largest diff. peak/hole /e Å <sup>-3</sup>                   | +1.135/-0.872                                                                       | +0.484/-0.463                                                                      | +0.501/-0.369                                                                      | +0.772/-0.835                                                                                                | +0.55/-0.46                                                                                                  |
